# Supplementary material for: Nucleotide diversity and linkage disequilibrium at 58 stress response and phenology candidate genes in a European beech (Fagus sylvatica L.) population from southeastern France
Source: Springer Nature journal article supplement (doi:10.1007/s11295-013-0658-0), 2013-10-02
Supplement: MOESM2 [file 11295_2013_658_MOESM2_ESM.doc]

Nucleotide diversity and linkage disequilibrium at 56 stress-response and phenology candidate genes in European beech (*Fagus sylvatica* L.)

H. Lalagüe1,2,3,, K. Csilléry2, S. Oddou-Muratorio2, J. Safrana2, C. de Quattro3, B. Fady2, S.C. González-Martínez4, G.G. Vendramin3

1) Scuola Superiore Sant'Anna, Piazza Martiri della Libertà 33, 56127 Pisa, Italy

2) INRA, UR629 Ecologie des Forêts Méditerranéennes (URFM), F-84914 Avignon, France

3) Plant Genetics Institute, National Research Council, Via Madonna del Piano 10, 50019 Sesto Fiorentino (Firenze), Italy

4) Department of Forest Ecology and Genetics, National Institute for Agriculture and Food Research and Technology (INIA) - Forest Research Centre (CIFOR), Madrid, Spain

**Corresponding author:**

G. G. Vendramin

CNR, Plant Genetics Institute, Via Madonna del Piano 10, 50019 Sesto Fiorentino (Firenze), Italy

E-mail: giovanni.vendramin@igv.cnr.it

Tel: +39 055 5225725

Fax: +39 055 5225729

Appendix 2. Details of the PCR reaction mixture and the thermal profile for the amplification of the selected genes (see also Appendix 1). Step1: denaturation, step2: annealing, step3: extension. Temperature in Celsius degrees.

| PCR protocol 1 | | | PCR protocol 2 | | | PCR protocol 3 | | |
| --- | --- | --- | --- | --- | --- | --- | --- | --- |
| DNA | 1µl (20ng/µl) |  | DNA | 1µl (20ng/µl) |  | DNA | 1µl (20ng/µl) |  |
| Buffer 5x GoTaq | 3µl |  | Buffer 5x GoTaq | 3µl |  | Buffer 5x GoTaq | 3µl |  |
| 10mM dNTP | 0,3µl |  | 10mM dNTP | 0,3µl |  | 10mM dNTP | 0,3µl |  |
| 10µM primers F | 0,3µl |  | 10µM primers F | 0,3µl |  | 10µM primers F | 0,3µl |  |
| 10µM primers R | 0,3µl |  | 10µM primers R | 0,3µl |  | 10µM primers R | 0,3µl |  |
| TAQ (MgCl2 1,5mM) | 0,15µl |  | TAQ (MgCl2 1,5mM) | 0,15µl |  | TAQ (MgCl2 1,5mM) | 0,15µl |  |
| H2O | 9,95µl |  | H2O | 9,95µl |  | H2O | 9,95µl |  |
|  |  |  |  |  |  |  |  |  |
| Cycle 1 x1 |  | 94° 5 min | Cycle 1 x1 |  | 94° 5 min | Cycle 1 x1 |  | 94° 5 min |
| Cycle 2 x10 | step1 | 94° 30 sec | Cycle 3 x35 | step1 | 94° 30 sec | Cycle 3 x35 | step1 | 94° 30 sec |
|  | step2 | 65-55° 30s |  | step2 | 60° 30 sec |  | step2 | 63° 30 sec |
|  | step3 | 72° 1 min |  | step3 | 72° 1 min |  | step3 | 72° 1 min |
| Cycle 3 x35 | step1 | 94° 30 sec | Cycle 4 x1 | step1 | 72° 7 min | Cycle 4 x1 | step1 | 72° 7 min |
|  | step2 | 55° 30 sec |  | step2 | 7° ∞ |  | step2 | 7° ∞ |
|  | step3 | 72° 1 min |  |  |  |  |  |  |
| Cycle 4 x1 | step1 | 72° 7 min |  |  |  |  |  |  |
|  | step2 | 7° ∞ |  |  |  |  |  |  |
